# Supplementary material for: RNAi-mediated knockdown of MTNR1B without disrupting the effects of melatonin on apoptosis and cell cycle in bovine granulose cells
Source: PeerJ. 2018 Apr 23;6:e4463. doi: 10.7717/peerj.4463 (PMC5918132; doi:10.7717/peerj.4463)
Supplement: Supplemental Information 1 — Raw data for Ct value of 11 target genes and 1 reference gene, cell cycle and cell apoptosis in four experimental group: pshRNA-negative group (control), pshRNA-2 group, pshRNA-2 plus melatonin group and melatonin group. [file peerj-06-4463-s001.xlsx]

## Sheet: MTNR1B
Group	Ct value of MTNR1B	Ct value of ACTB
pshRNA-negative	31.5405	17.5501
pshRNA-negative	30.9499	16.8532
pshRNA-negative	30.7873	16.632
pshRNA-1	32.251	16.8804
pshRNA-1	32.3834	16.9704
pshRNA-1	32.4441	17.0817
pshRNA-2	31.7496	15.9694
pshRNA-2	31.908	15.6638
pshRNA-2	31.2871	15.5685
pshRNA-3	30.3901	15.6169
pshRNA-3	32.7216	17.9539
pshRNA-3	30.4402	15.4821

## Sheet: MTNR1A
Group	Ct value of MTNR1A	Ct value of ACTB
pshRNA-negative	36.681	14.8827
pshRNA-negative	36.5471	14.9632
pshRNA-negative	36.1555	14.4999
pshRNA-2	35.6991	14.8153
pshRNA-2	35.5522	14.5529
pshRNA-2	35.8593	14.682
pshRNA-2+melatonin	36.2251	15.6532
pshRNA-2+melatonin	36.1369	15.4513
pshRNA-2+melatonin	36.6908	16.1379
melatonin	34.6125	14.3395
melatonin	34.3303	14.1351
melatonin	35.4884	15.0775

## Sheet: BCL2
Group	Ct value of BCL2	Ct value of ACTB
pshRNA-negative	25.198	15.3035
pshRNA-negative	24.8961	15.1301
pshRNA-negative	24.9788	15.0452
pshRNA-2	25.1711	14.6401
pshRNA-2	25.3375	14.8722
pshRNA-2	24.8567	14.6599
pshRNA-2+melatonin	24.0308	14.7087
pshRNA-2+melatonin	24.0509	14.5174
pshRNA-2+melatonin	24.0839	14.4226
melatonin	24.8289	15.469
melatonin	24.8627	15.2309
melatonin	24.253	14.9193

## Sheet: BAX
Group	Ct value of BAX	Ct value of ACTB
pshRNA-negative	25.1273	15.3872
pshRNA-negative	25.383	15.5154
pshRNA-negative	24.4765	15.2213
pshRNA-2	24.3856	15.2266
pshRNA-2	24.3051	15.1222
pshRNA-2	23.9671	15.0703
pshRNA-2+melatonin	24.8737	14.8409
pshRNA-2+melatonin	24.6155	14.5828
pshRNA-2+melatonin	24.3169	14.3352
melatonin	25.7819	15.8174
melatonin	25.69	15.5086
melatonin	25.5293	15.2421

## Sheet: BCL-XL
Group	Ct value of BCL-XL	Ct value of ACTB
pshRNA-negative	34.6992	14.4444
pshRNA-negative	34.7817	14.6033
pshRNA-negative	34.9992	15.0382
pshRNA-2	36.2266	14.5964
pshRNA-2	36.0461	14.7552
pshRNA-2	35.3431	14.0419
pshRNA-2+melatonin	36.282	14.6681
pshRNA-2+melatonin	35.5983	14.4402
pshRNA-2+melatonin	37.1356	14.0029
melatonin	35.0282	15.7058
melatonin	34.5811	15.1764
melatonin	34.6226	14.9805

## Sheet: CASP3
Group	Ct value of CASP3	Ct value of ACTB
pshRNA-negative	22.7436	14.9531
pshRNA-negative	23.1604	15.4655
pshRNA-negative	22.8008	15.0013
pshRNA-2	21.4615	14.4044
pshRNA-2	21.8355	14.7824
pshRNA-2	21.7198	14.3254
pshRNA-2+melatonin	21.7072	13.9762
pshRNA-2+melatonin	22.2477	13.8842
pshRNA-2+melatonin	21.8378	13.6838
melatonin	24.7945	16.5264
melatonin	23.8338	15.8434
melatonin	24.2755	16.0786

## Sheet: TP53
Group	Ct value of TP53	Ct value of ACTB
pshRNA-negative	22.4624	15.4991
pshRNA-negative	21.9706	15.2626
pshRNA-negative	22.8825	15.6976
pshRNA-2	22.1362	15.4269
pshRNA-2	22.7494	15.4368
pshRNA-2	22.6099	15.4836
pshRNA-2+melatonin	22.9591	15.6039
pshRNA-2+melatonin	23.072	15.3947
pshRNA-2+melatonin	23.0719	15.4379
melatonin	23.706	16.0955
melatonin	23.2828	15.697
melatonin	23.3212	15.676

## Sheet: GPX4
Group	Ct value of GPX4	Ct value of ACTB
pshRNA-negative	17.6065	14.3171
pshRNA-negative	18.3949	15.0971
pshRNA-negative	18.1529	14.9229
pshRNA-2	18.0224	14.659
pshRNA-2	18.3001	14.941
pshRNA-2	17.1813	14.6392
pshRNA-2+melatonin	18.1038	14.4205
pshRNA-2+melatonin	17.7485	14.5557
pshRNA-2+melatonin	17.9147	14.2984
melatonin	20.4629	17.0395
melatonin	19.8729	16.0132
melatonin	20.1437	15.6236

## Sheet: SOD1
Group	Ct value of SOD1	Ct value of ACTB
pshRNA-negative	19.4999	15.4838
pshRNA-negative	19.3718	15.2715
pshRNA-negative	19.1628	15.2048
pshRNA-2	19.5956	15.2401
pshRNA-2	19.5578	15.0908
pshRNA-2	18.5825	15.2775
pshRNA-2+melatonin	19.184	14.8424
pshRNA-2+melatonin	19.1296	15.2329
pshRNA-2+melatonin	19.2275	14.6066
melatonin	19.5205	16.1468
melatonin	19.192	15.6714
melatonin	19.0638	15.2543

## Sheet: CDKN1A
Group	Ct value of CDKN1A	Ct value of ACTB
pshRNA-negative	19.7986	15.4027
pshRNA-negative	20.1863	15.6869
pshRNA-negative	19.7533	15.4152
pshRNA-2	19.797	15.5802
pshRNA-2	20.463	16.0739
pshRNA-2	20.3692	16.2443
pshRNA-2+melatonin	19.7806	15.9934
pshRNA-2+melatonin	19.6445	16.055
pshRNA-2+melatonin	19.5848	16.1251
melatonin	20.0177	16.2288
melatonin	19.2122	15.5887
melatonin	19.1655	15.5263

[truncated: 4 more sheets: CCND1, CCNE1, Cell cycle, Apoptosis]
